# Supplementary material for: EIF3C-enhanced exosome secretion promotes angiogenesis and tumorigenesis of human hepatocellular carcinoma
Source: PubMed Central journal article supplement (PMC5862571; doi:10.18632/oncotarget.24149), 2018-01-11
Supplement: oncotarget-09-13193-s001.pdf [file oncotarget-09-13193-s001.pdf]

# EIF3C-enhanced exosome secretion promotes angiogenesis and tumorigenesis of human hepatocellular carcinoma

## SUPPLEMENTARY MATERIALS

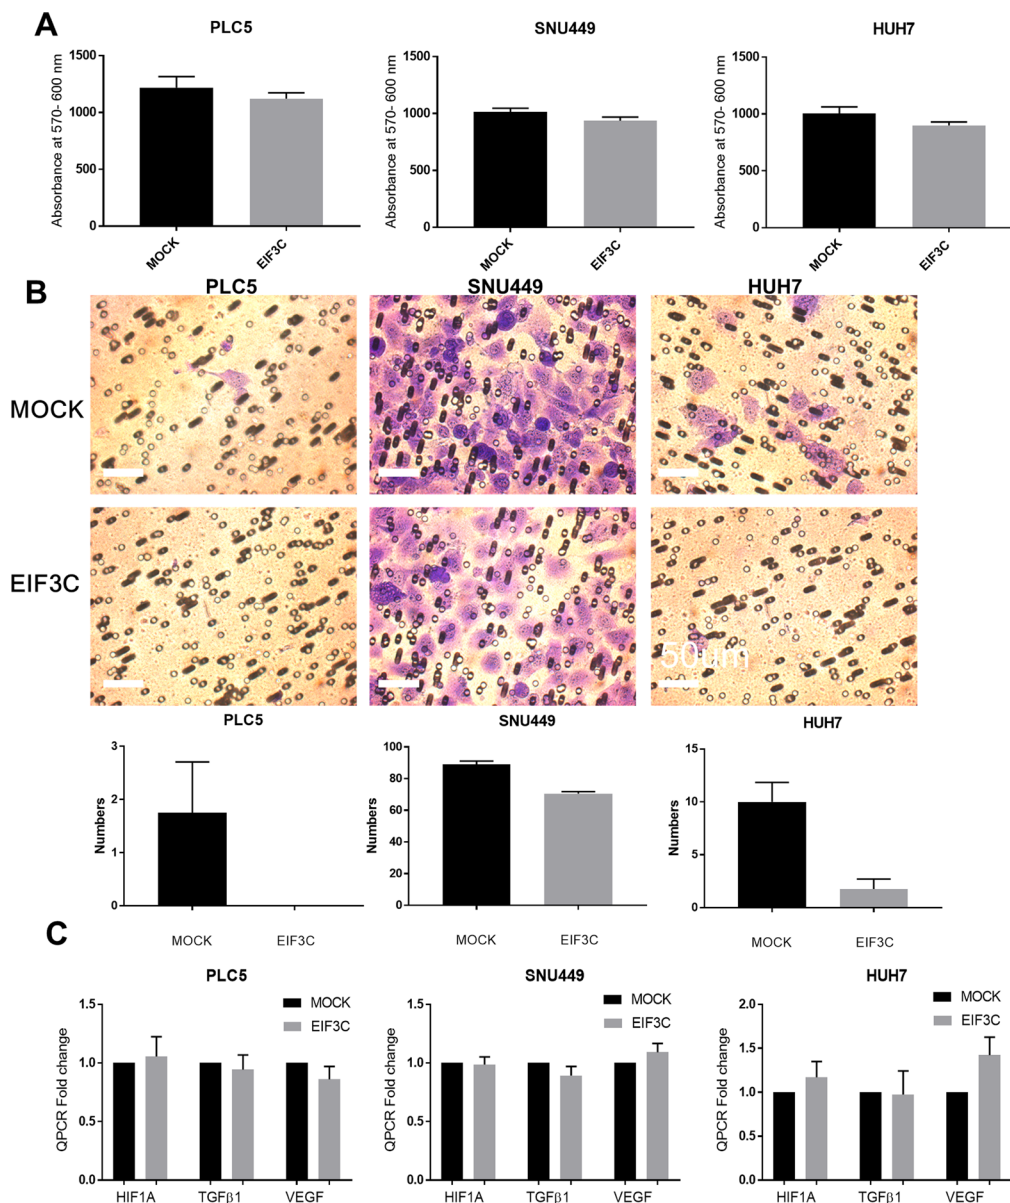

**Supplementary Figure 1: Overexpressed-EIF3C did not alter cell proliferation, migration and expression of TGFβ1 and VEGF.** (A) Expression of EIF3C in HCC cells PLC5, SNU449 and Huh7 did not alter cell proliferation rates in compared to that of parental cells. (B) Expression of EIF3C in HCC cells PLC5, SNU449 and Huh7 cells might slightly reduced trans-well cell migration. (C) Expression of EIF3C in HCC cells PLC5, SNU449 and Huh7 did not alter expression of migration-related genes such as HIF1A, TGFβ1 and VEGF by quantitative RT-qPCR assays.

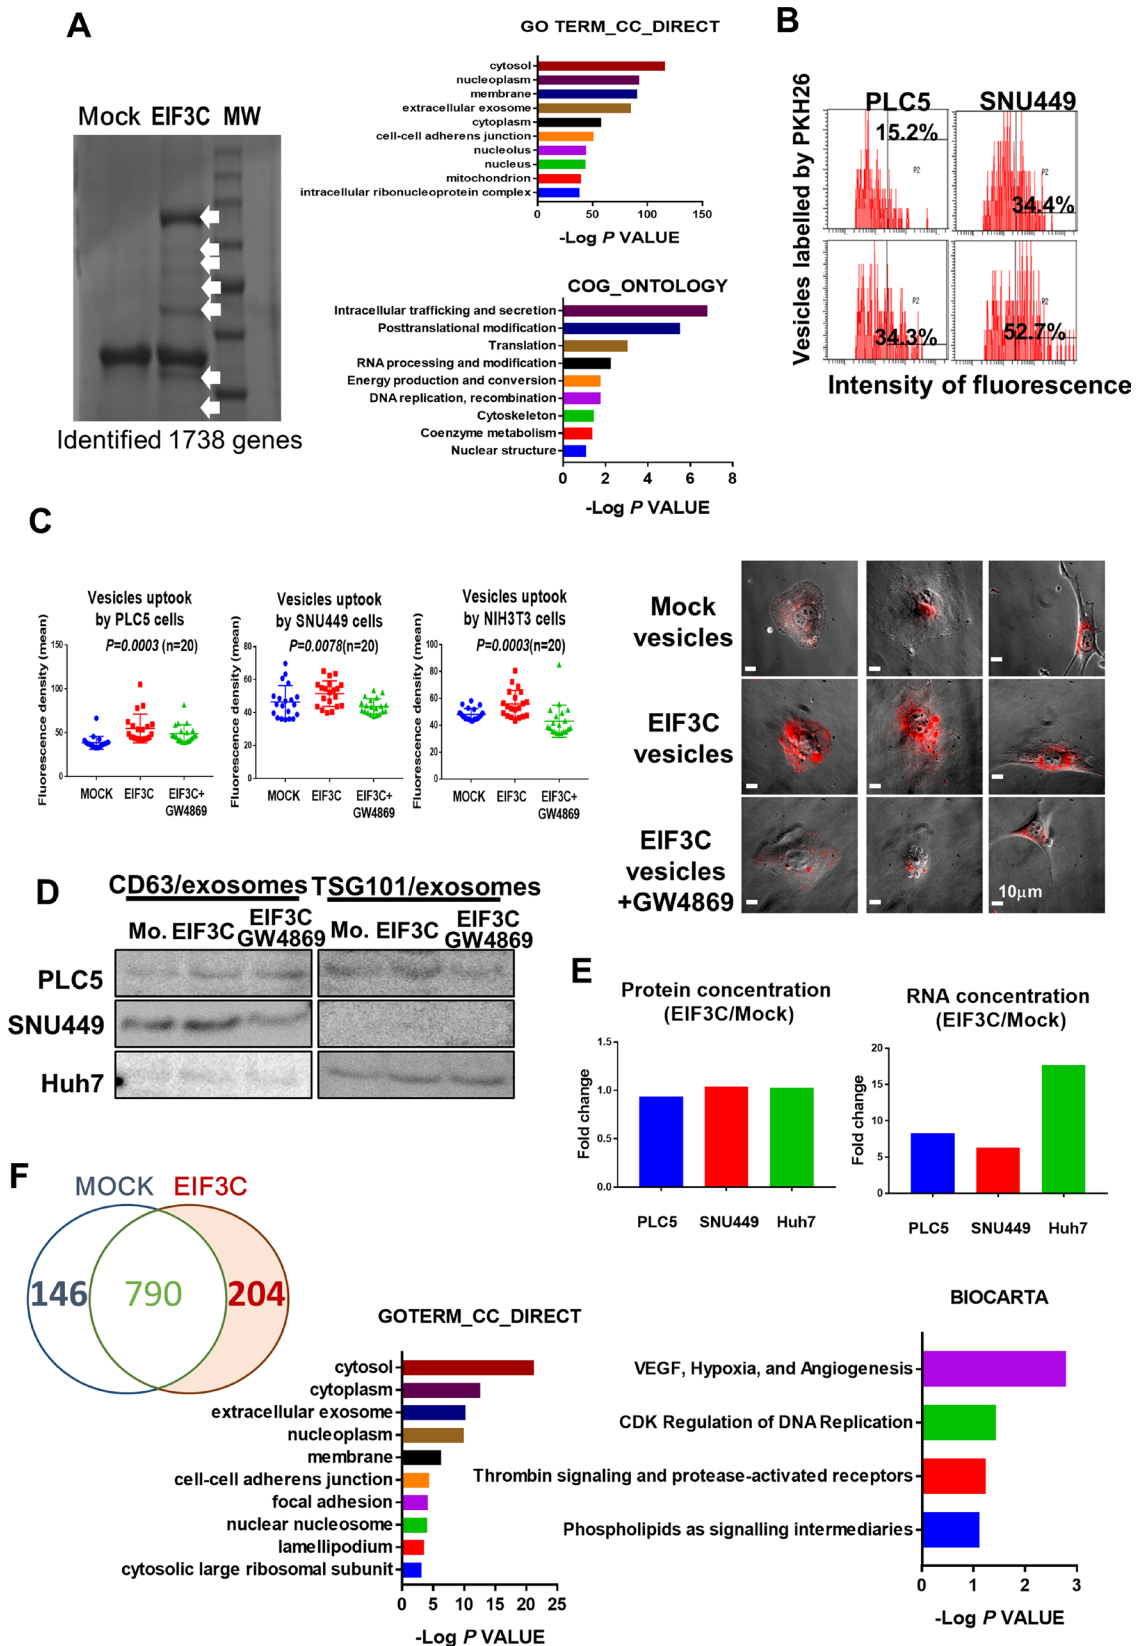

**Supplementary Figure 2: Exploring molecular mechanisms of overexpressed-EIF3C and characterization of EIF3C-enhanced exosomes in HCC cells.** (A) EIF3C immunoprecipitation-mass spectrometry in overexpressed EIF3C PLC5 cells (white arrows) gained 1738 gene and analyzed gene ontology and KEGG pathway of these genes in DAVID Bioinformatics Resources 6.8. (B) Uptook of PKH26 fluorescent labeled vesicles from EIF3C-expressed HCC cells in compared to that of mock vesicles of HCC cells. (C) HCC and NIH3T3 cells up took more PKH26 labelled vesicles from EIF3C-released than that of mock cells. (ANOVA summary). (D) Western blotting analysis of exosome markers CD63 and TSG 101 in purified exosomes of HCC cells with mock, EIF3C and EIF3C expression co-treated with GW4869 exosome generation inhibitor. (E) RNA and protein concentration ratios in exosomes of mock and EIF3C-overexpressed HCC cells. (F) Mass spectrometry analysis in compared between EIF3C and mock mediated PLC5 exosomes followed by gene ontology and BIOCARTA pathway analysis by DAVID Bioinformatics Resources 6.8.

**Supplementary Table 1: List of 1738 EIF3C protein complex identified by immunoprecipitation and mass spectrometry.**  
See Supplementary\_Table\_1

**Supplementary Table 2: List of exosome proteins (Entrez Gene ID) in PLC5 with and without expression of EIF3C.**  
See Supplementary\_Table\_2
